# Supplementary material for: The plasma metabolome of long COVID-19 patients two years after infection
Source: bioRxiv or medRxiv preprint supplement (doi:10.1101/2023.05.03.23289456), 2023-05-05

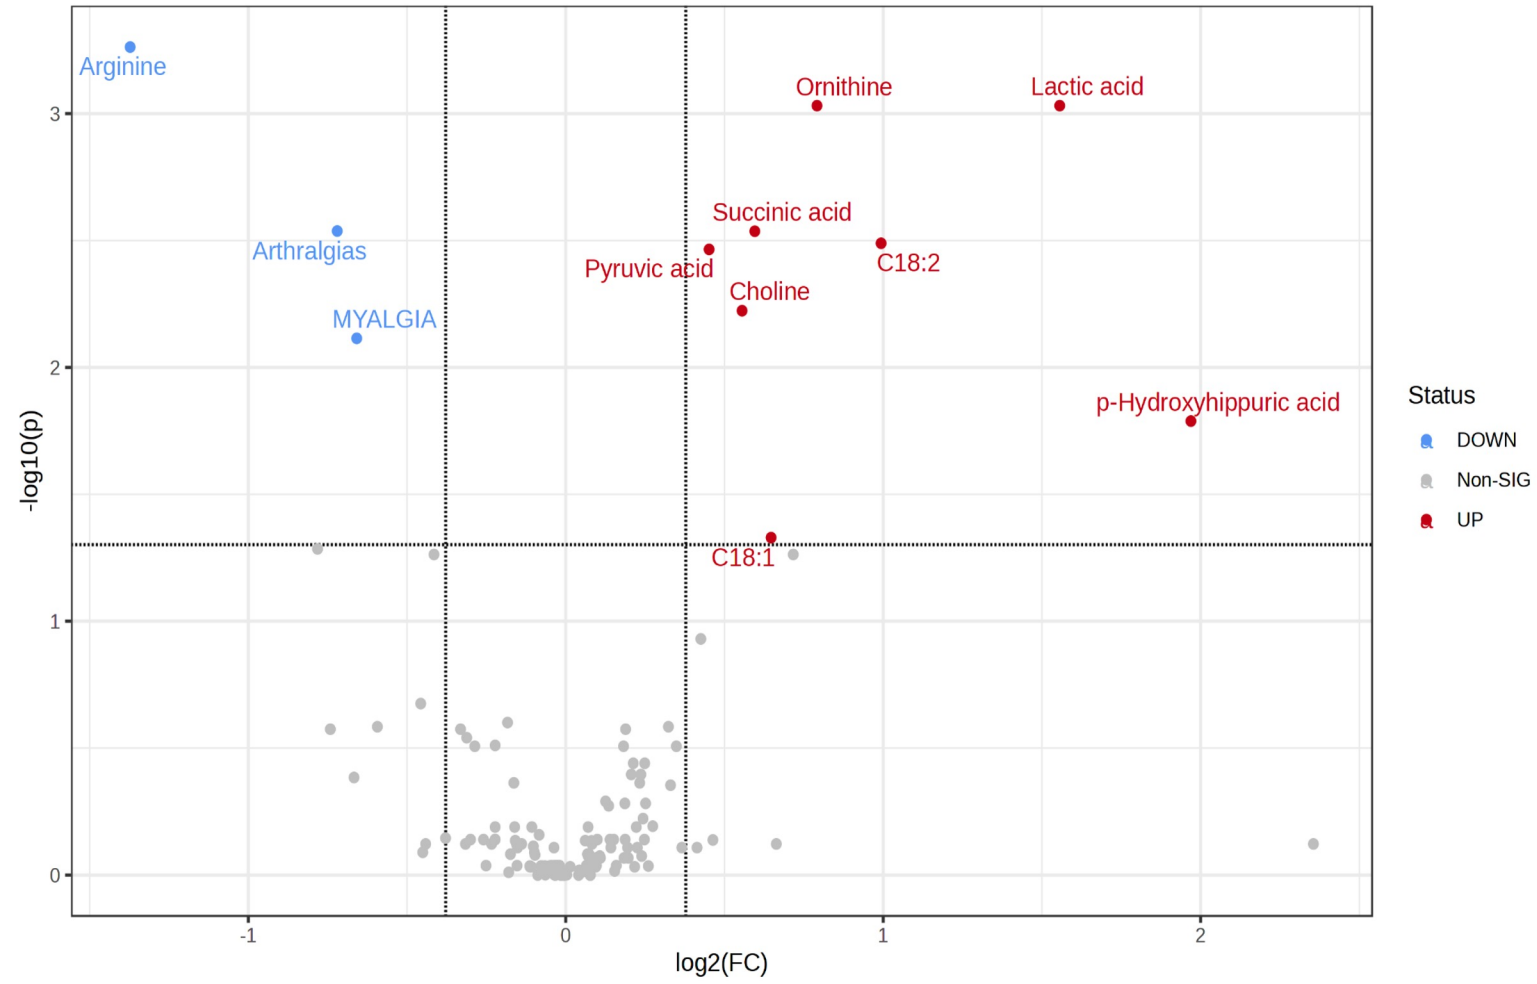

Supplement: Supplementary file [file media-4.pdf]
